# Supplementary material for: Mitochondria and Lysosomes Participate in Vip3Aa-Induced Spodoptera frugiperda Sf9 Cell Apoptosis
Source: PubMed Central journal article supplement (PMC7076775; doi:10.3390/toxins12020116), 2020-02-13
Supplement: toxins-12-00116-s001.pdf [file toxins-12-00116-s001.pdf]

# Supplementary Materials: Mitochondria and Lysosomes Participate in Vip3Aa-Induced *Spodoptera frugiperda* Sf9 Cell Apoptosis

Xiaoyue Hou, Lu Han, Baoju An, Yanli Zhang, Zhanglei Cao, Yunda Zhan, Xia Cai, Bing Yan and Jun Cai

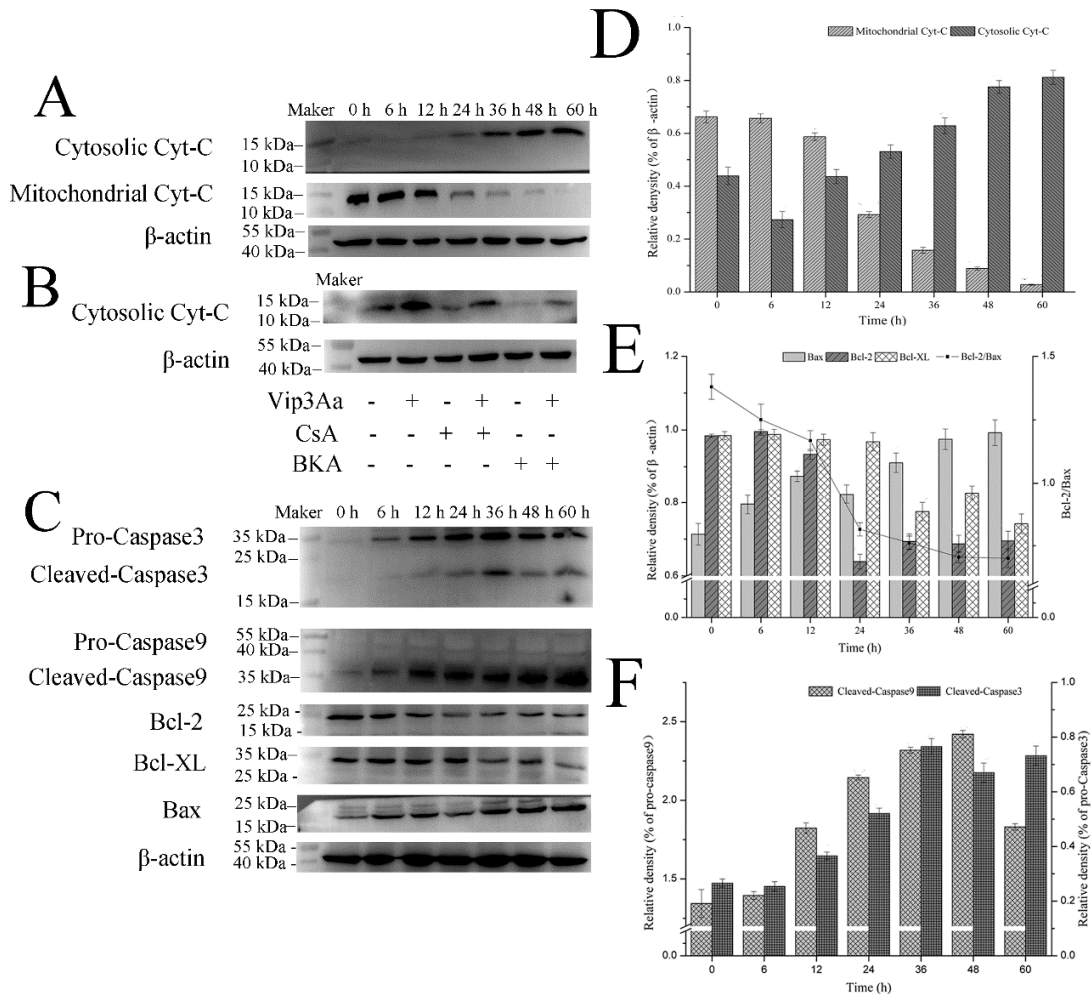

**Figure S1.** Impacts of Vip3Aa in Sf9 cells on the cytochrome c distribution and the level of mitochondria-associated proteins. (A) Cytochrome c distribution in mitochondria and cytosol was detected by Western blotting. (B) Cytochrome c distribution in Sf9 cells after various treatments. CsA (5  $\mu$ M) or BKA (10  $\mu$ M) was pretreated the Sf9 cells for 2 h before adding Vip3Aa. (C) Mitochondria-associated protein levels in Sf9 cells were tested using Western blotting. (D, E, and F) Densitometry analysis of (A) and (C).

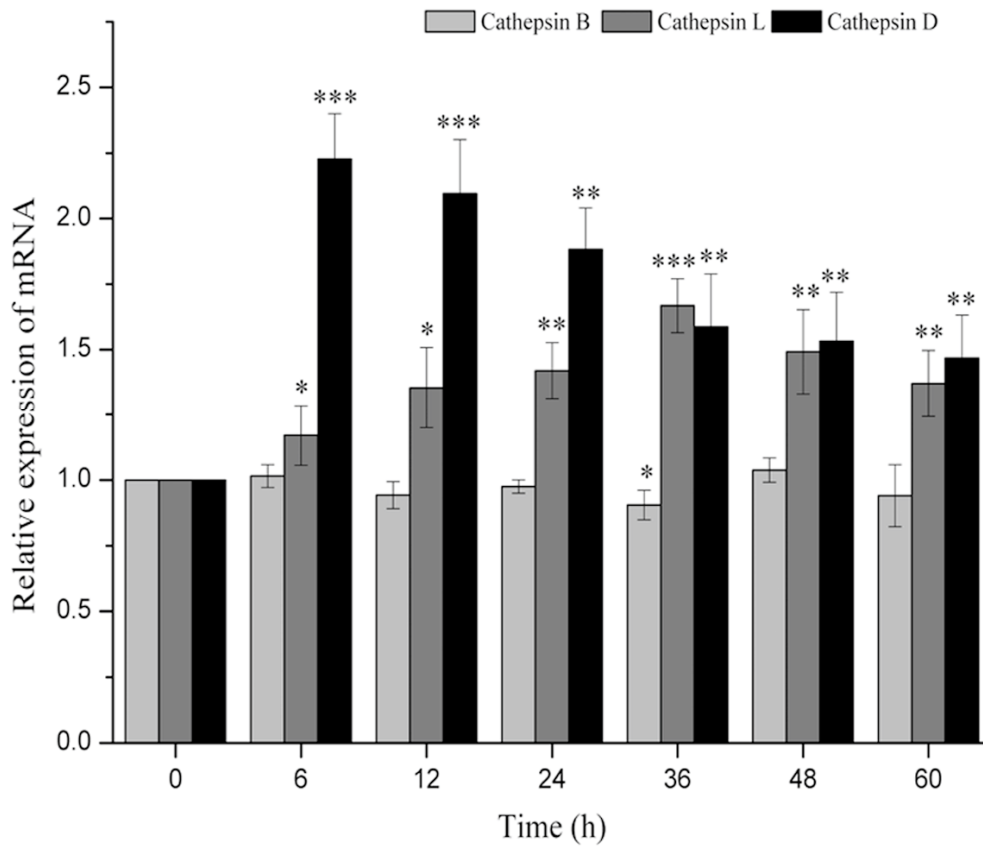

**Figure S2.** Effect of Vip3Aa on cathepsins mRNA level in Sf9 cells at different time.

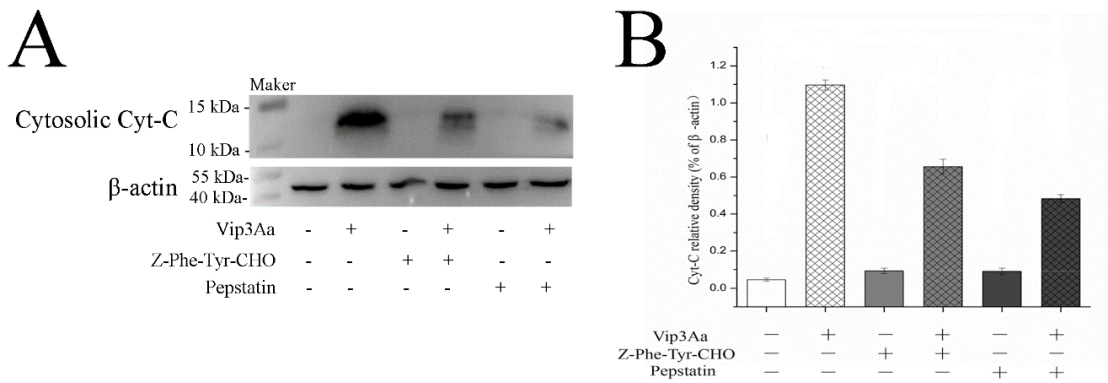

**Figure S3.** Effects of cathepsin (L and D) inhibitors on cytochrome c distribution. (A) cytochrome c distribution in cytosol was detected by Western blotting. (B) Densitometry analysis of (A).

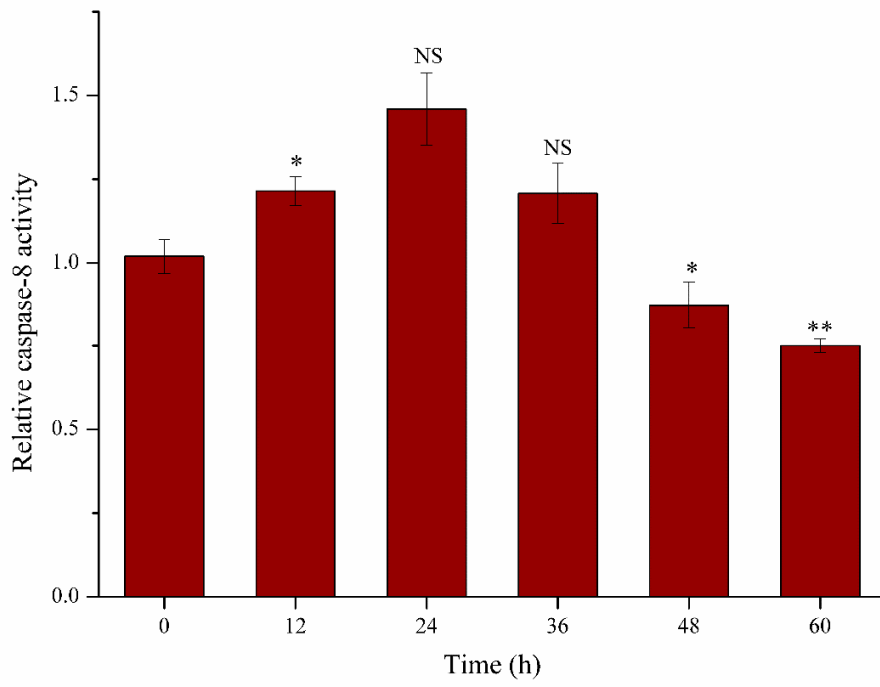

**Figure S4.** Effects of Vip3Aa on caspase-8 activity. Significant tests from the corresponding controls (without Vip3Aa treatment) are indicated by NS, not significant,  $*p < 0.05$ ,  $**p < 0.01$ ,  $***p < 0.001$ .

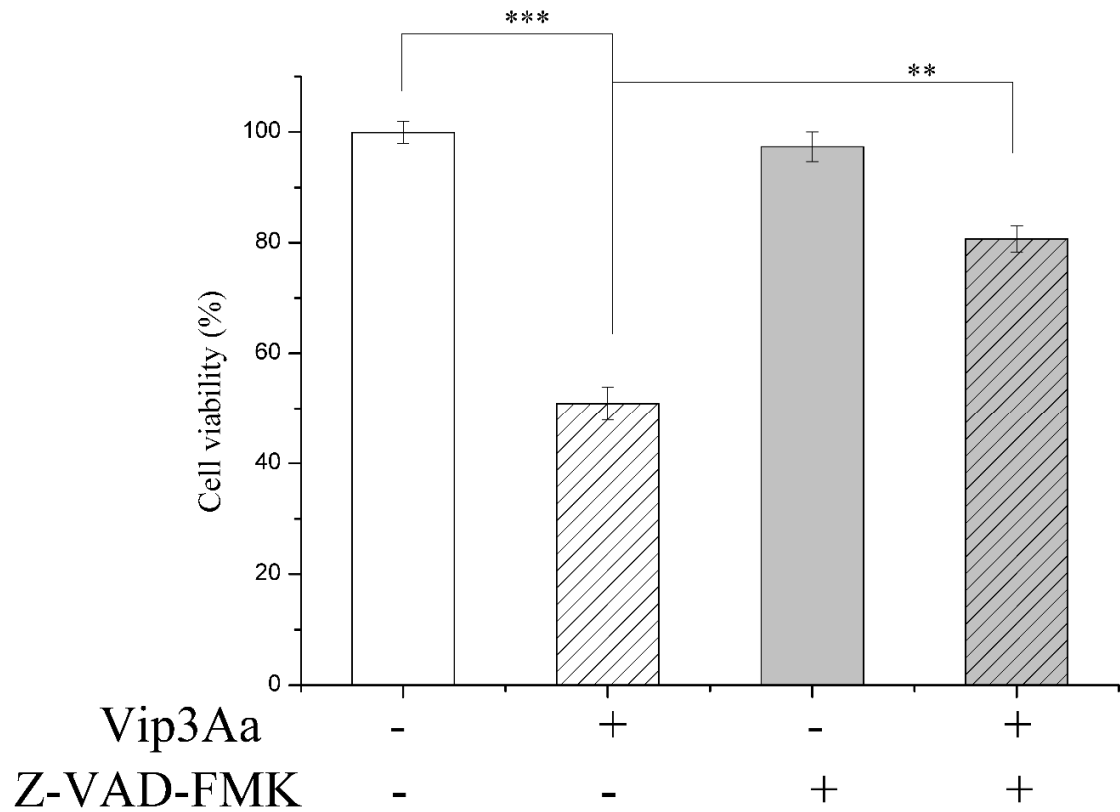

**Figure S5.** Effects of caspase-3 inhibitor on Sf9 cell viability. Significant tests from the corresponding controls (without Vip3Aa treatment) are indicated by \* $p < 0.05$ , \*\* $p < 0.01$ , \*\*\* $p < 0.001$ .

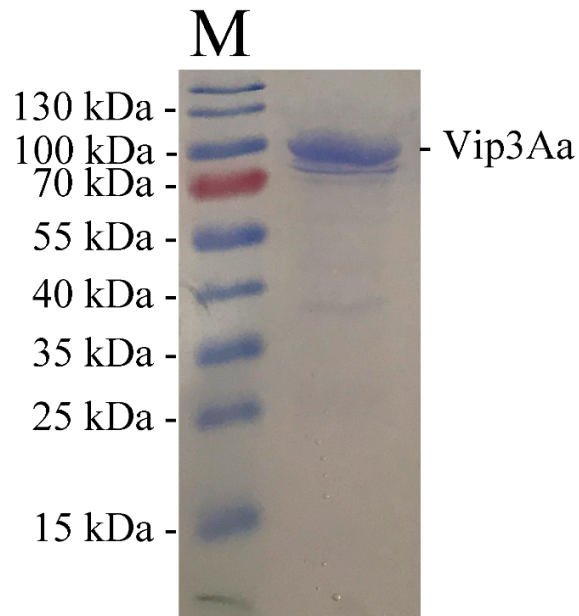

**Figure S6.** Result of purified Vip3Aa detected by SDS-PAGE electrophoresis analysis. M, protein maker 26619.
